# Supplementary material for: Expressive Dominant Versus Receptive Dominant Language Patterns in Young Children: Findings from the Study to Explore Early Development
Source: Springer Nature journal article supplement (doi:10.1007/s10803-019-03999-x), 2019-04-01
Supplement: MOESM1 [file 16589958]

**SUPPLEMENTAL MATERIALS**

Results of sensitivity analysis using inverse probability weighting to adjust for participants missing an ELAE or RLAE score.

Methods for inverse probability weighting model

The use of inverse probability weighting to account for non-response has been described in detail elsewhere (Hofler, Pfister, Lieb, & Wittchen, 2005; Seaman & White, 2011). The weights for each participant are the inverse probability of having an expressive language and receptive language age equivalent score on the Mullen Scales of Early Learning (i.e., weights are the inverse probability of a participant being eligible). Weights were normalized by dividing the weight of each participant used in the analysis by the (unweighted) average of the weights of all the analyzed participants. Assuming that all assumptions are met, the use of inverse probability weights reduces bias due to non-response, such that the resulting effect estimates reflect the effect in the population.

To create the weights for this analysis, we constructed a single logistic regression model to predict participant eligibility. Using a forward selection process (based on a p-value threshold of 0.15) to select terms to be added to the model, we included the following predictors: child year of birth, maternal age at child birth, child sex, maternal education, maternal ethnicity, and maternal race, as well as all two-way interactions between predictors. Thus, our final model included the following set of predictors: maternal age, child sex, maternal education, maternal age by maternal education, child year of birth, maternal ethnicity, maternal age by maternal ethnicity, and maternal education by child year of birth. To evaluate the model, we used the c-statistic (c = 0.61) which suggests some predictive value and the Hosmer-Lemeshow goodness of fit statistic (*p* = 0.83) providing evidence that the model is adequate and fits the data reasonably well.

Supplemental References

Höfler, M., Pfister, H., Lieb, R., & Wittchen, H. (2005). The use of weights to account for non-response and drop-out. *Social Psychiatry and Psychiatric Epidemiology 40,* 291-299.

Seaman, S. & White, I. (2011). Review of inverse probability weighting for dealing with missing data. *Statistical Methods in Medical Research 22*(3), 278-295.

Supplemental Table 1.Characteristics of study participants by eligibility status, inverse probability weight adjusted*

|  | *Not eligible* | *Eligible* | *p-value*** |
| --- | --- | --- | --- |
| Child age (mo) at clinic visit | 58.9 ± 6.6 | 59.4 ± 7.1 | 0.83 |
| Maternal age (yr) at child birth | 31.5 ± 5.8 | 31.6 ± 5.7 | 0.90 |
| Sex |  |  | 0.70 |
| Female | 35.5% | 35.1% |  |
| Male | 63.2% | 64.9% |  |
| Not specified + | 1.3% | 0.0% |  |
| Maternal education |  |  | 0.92 |
| 8th grade or less | 1.1% | 1.7% |  |
| 9th-12th grade | 5.3% | 4.8% |  |
| High school | 16.7% | 16.5% |  |
| Some college, no degree | 20.2% | 20.4% |  |
| Bachelor's degree | 25.3% | 25.0% |  |
| Advanced degree | 28.9% | 30.1% |  |
| Unknown/Missing + | 2.4% | 1.6% |  |
| Maternal ethnicity |  |  | 0.97 |
| Not Hispanic | 76.0% | 76.3% |  |
| Hispanic | 10.9% | 11.0% |  |
| Unknown/Missing + | 13.1% | 12.6% |  |
| Maternal race |  |  | 0.33 |
| White | 71.1% | 74.0% |  |
| Black, African-American | 21.5% | 18.4% |  |
| American Indian | 0.2% | 0.5% |  |
| Asian, Pacific Islander | 5.0% | 5.3% |  |
| Other, Multiracial | 0.9% | 1.3% |  |
| Unknown/Missing + | 1.3% | 0.6% |  |
| *Note: Eligible subjects are those with a Mullen ELAE and RLAE score, values expressed as % or mean ± standard deviation  **P-value comparisons across eligibility for categorical variables are based on chi-square test of homogeneity; p-values for continuous variables are based on ANOVA  +P-value calculation does not include Not Specified, Missing, or Unknown categories | | | |

Supplemental Table 2.Characteristics of study participants by case status, inverse probability weight adjusted.

|  | *Case Status** | | | | |
| --- | --- | --- | --- | --- | --- |
|  | *Overall (N=2,571)* | *ASD (N=686)* | *DD (N=989)* | *POP (N=896)* | *p-value*** |
| *Demographic Characteristics*  Child CA (mo) at clinic visit | 59.4 ± 7.1 | 59.3 ± 6.6 | 59.5 ± 7.2 | 59.3 ± 7.4 | 0.87 |
| Maternal age (yr) | 31.6 ± 5.7 | 31.4 ± 5.6 | 31.5 ± 5.9 | 31.8 ± 5.6 | 0.22 |
| Male | 64.9% | 81.2% | 65.6% | 51.6% | <0.001 |
| Maternal education |  |  |  |  | <0.001 |
| 8th grade or less | 1.7% | 1.8% | 2.6% | 0.5% |  |
| 9th-12th grade | 4.8% | 4.3% | 6.2% | 3.8% |  |
| High school | 16.5% | 18.4% | 18.8% | 12.3% |  |
| Some college, no degree | 20.4% | 22.8% | 20.1% | 18.8% |  |
| Bachelor's degree | 25.0% | 24.0% | 24.1% | 26.8% |  |
| Advanced degree | 30.1% | 26.9% | 26.6% | 36.3% |  |
| Unknown/Missing | 1.6% | 1.8% | 1.7% | 1.5% |  |
| Maternal ethnicity |  |  |  |  | 0.03 |
| Not Hispanic | 76.3% | 75.3% | 75.2% | 78.4% |  |
| Hispanic | 11.0% | 11.2% | 12.8% | 8.9% |  |
| Unknown/Missing | 12.6% | 13.5% | 12.0% | 12.7% |  |
| Maternal race |  |  |  |  | <0.001 |
| White | 74.0% | 68.1% | 73.3% | 79.3% |  |
| Black, African-American | 18.4% | 21.6% | 20.0% | 14.1% |  |
| American Indian | 0.5% | 1.0% | 0.4% | 0.1% |  |
| Asian, Pacific Islander | 5.3% | 7.6% | 4.3% | 4.5% |  |
| Other, Multiracial | 1.3% | 1.3% | 1.5% | 1.2% |  |
| Unknown/Missing | 0.6% | 0.4% | 0.6% | 0.7% |  |
| *Clinical Characteristics*  ELAE | 48.9 ± 16.6 | 34.8 ± 16.1 | 49.5 ± 14.6 | 59.1 ± 10.1 | <0.001 |
| EL raw score | 38.8 ± 10.4 | 29.9 ± 11.6 | 39.5 ± 8.8 | 44.9 ± 4.8 | <0.001 |
| RLAE | 51.1 ± 16.5 | 37.1 ± 17.8 | 52.1 ± 14.0 | 60.7 ± 9.1 | <0.001 |
| RL raw score | 39.6 ± 9.6 | 31.4 ± 11.6 | 40.5 ± 7.5 | 44.9 ± 4.1 | <0.001 |
| Social affect severity | -- | 5.5 ± 1.4 | -- | -- |  |
| VRAE | 53.6 ± 14.3 | 43.2 ± 16.7 | 54.7 ± 12.5 | 60.3 ± 8.1 | <0.001 |
| VRAE:CA ratio | 0.9 ± 0.2 | 0.7 ± 0.3 | 0.9 ± 0.2 | 1.0 ± 0.1 | <0.001 |
| RLAE/ELAE ratio | 1.1 ± 0.3 | 1.1 ± 0.5 | 1.1 ± 0.2 | 1.0 ± 0.1 | <0.001 |

* Values expressed as N (%) or mean ± standard deviation

**P-value comparisons across case status for categorical variables are based on chi-square test of homogeneity; p-values for continuous variables are based on ANOVA.

+P-value calculation does not include Unknown or Missing categories

Supplemental Table 3. Adjusted means* of receptive and expressive language raw scores and age equivalents by final classification and language dominance, inverse probability weights applied (N = 2523, WtN = 2570)

|  | *ASD* | *DD* | *POP* |
| --- | --- | --- | --- |
| Expressive Dominant | n=162 | n=113 | n=99 |
| Receptive raw score | 30.16 (29.33, 30.99) | 37.07 (36.21, 37.92) | 39.15 (38.25, 40.06) |
| Receptive AE | 36.50 (35.06, 37.94) | 45.02 (43.54, 46.49) | 48.61 (47.04, 50.18) |
| Expressive raw score | 35.05 (34.12, 35.97) | 41.51 (40.56, 42.46) | 43.60 (42.59, 44.61) |
| Expressive AE | 42.45 (40.95, 43.95) | 53.25 (51.71, 54.78) | 58.30 (56.66, 59.93) |
| Receptive Dominant | n=205 | n=255 | n=140 |
| Receptive raw score | 36.25 (35.53, 36.97) | 39.52 (38.94, 40.10) | 41.05 (40.27, 41.83) |
| Receptive AE | 45.15 (43.91, 46.40) | 50.51 (49.50, 51.52) | 54.07 (52.72, 55.42) |
| Expressive raw score | 29.99 (29.19, 30.79) | 33.71 (33.06, 34.37) | 36.05 (35.18, 36.92) |
| Expressive AE | 34.90 (33.60, 36.20) | 39.61 (38.56, 40.66) | 42.59 (41.18, 43.99) |
| Non-dominant | n=318 | n=621 | n=657 |
| Receptive raw score | 36.31 (35.69, 36.93) | 39.29 (38.87, 39.72) | 40.49 (40.05, 40.92) |
| Receptive AE | 44.37 (43.30, 45.44) | 50.07 (49.34, 50.80) | 53.44 (52.69, 54.19) |
| Expressive raw score | 35.65 (34.96, 36.34) | 39.15 (38.68, 39.62) | 40.50 (40.01, 40.98) |
| Expressive AE | 43.09 (41.97, 44.21) | 49.24 (48.48, 50.00) | 52.87 (52.09, 53.65) |

Note: AE = age equivalent, ASD = autism spectrum disorder, DD = developmental disability, POP = population control

* Values are adjusted by sex, final case status, child age (mo) at clinic visit, language dominance status, VRAE:CA ratio, maternal age, maternal education, final case status by language dominance interaction, and sex by final case status interaction

Supplemental Table 4: Unadjusted and adjusted odds ratio estimates and 95% confidence intervals for language dominance by case status, inverse probability weights applied (N = 2524, WtN = 2527)

|  | *Language dominance comparisons* | | |
| --- | --- | --- | --- |
|  | *ED vs ND* | *RD vs ND* | *ED vs RD* |
| ASD vs POP | 3.53 (2.64, 4.70) | 3.09 (2.40, 3.99) | 1.14 (0.82, 1.59) |
| 3.49 (2.58, 4.71) * | 2.91 (2.23, 3.79) * | 1.20 (0.85, 1.70) * |
| ASD vs DD | 2.84 (2.15, 3.75) * | 1.59 (1.26, 2.00) * | 1.79 (1.32, 2.42) * |
| 2.95 (2.22, 3.91) * | 1.59 (1.26, 2.01) * | 1.85 (1.36, 2.52) * |
| DD vs POP | 1.24 (0.92, 1.67) * | 1.95 (1.54, 2.46) * | 0.64 (0.45, 0.90) * |
| 1.18 (0.87, 1.60) * | 1.82 (1.44, 2.32) * | 0.65 (0.46, 0.92) * |

* Odds ratios adjusted by sex, maternal age, and maternal education

Note: ED = expressive dominant, RD = receptive dominant, ND = non-dominant, ASD = autism spectrum disorder, DD = developmental disability, POP = population control

Results of sensitivity analysis to assess differences in ELAE/RLAE ratio distribution by child chronological age

Supplemental Table 5. Adjusted means* of receptive and expressive language raw scores and age equivalents by final classification and language dominance – language dominance categories defined according to child chronological age

|  | *ASD* | *DD* | *POP* |
| --- | --- | --- | --- |
| Expressive Dominant | N = 159 | N = 110 | N = 91 |
| Receptive raw score | 30.13 (29.30, 30.97) | 36.95 (36.10, 37.81) | 38.87 (37.94, 39.79) |
| Receptive AE | 36.44 (34.99, 37.88) | 44.63 (43.15, 46.11) | 48.06 (46.46, 49.65) |
| Expressive raw score | 34.98 (34.05, 35.91) | 41.31 (40.36, 42.27) | 43.29 (42.25, 44.32) |
| Expressive AE | 42.32 (40.82, 43.83) | 52.76 (51.22, 54.30) | 57.70 (56.03, 59.36) |
| Receptive Dominant | N = 203 | N = 234 | N = 139 |
| Receptive raw score | 36.24 (35.52, 36.97) | 39.47 (38.86, 40.07) | 40.88 (40.11, 41.66) |
| Receptive AE | 44.95 (43.69, 46.20) | 50.49 (49.44, 51.53) | 53.78 (52.44, 55.12) |
| Expressive raw score | 29.86 (29.05, 30.67) | 33.53 (32.85, 34.20) | 35.95 (35.08, 36.82) |
| Expressive AE | 34.47 (33.16, 35.78) | 39.25 (38.16, 40.34) | 42.42 (41.02, 43.82) |
| Non-dominant | N = 318 | N = 624 | N = 645 |
| Receptive raw score | 36.34 (35.71, 36.96) | 39.38 (38.95, 39.80) | 40.56 (40.12, 41.00) |
| Receptive AE | 44.51 (43.43, 45.58) | 50.26 (49.52, 50.99) | 53.63 (52.87, 54.39) |
| Expressive raw score | 35.63 (34.93, 36.32) | 39.11 (38.63, 39.59) | 40.56 (40.06, 41.05) |
| Expressive AE | 43.15 (42.03, 44.27) | 49.22 (48.45, 49.99) | 53.06 (52.26, 53.85) |

Note: AE = age equivalent, ASD = autism spectrum disorder, DD = developmental disability, POP = population control

* Values are adjusted by sex, final case status, child age (mo) at clinic visit, language dominance status, VRAE:CA ratio, final case status by language dominance interaction, sex by final case status interaction, maternal age, and maternal education

Supplemental Table 6: Unadjusted and adjusted odds ratio estimates and 95% confidence intervals for language dominance by case status – language dominance categories defined according to child chronological age (N = 2524)

|  | *Language dominance comparisons* | | |
| --- | --- | --- | --- |
|  | *ED vs ND* | *RD vs ND* | *ED vs RD* |
| ASD vs POP | 3.57 (2.67, 4.77) | 2.96 (2.30, 3.82) | 1.20 (0.86, 1.68) |
| 3.48 (2.57, 4.72)* | 2.74 (2.11, 3.57)* | 1.27 (0.90, 1.80)* |
| ASD vs DD | 2.85 (2.16, 3.77) | 1.70 (1.35, 2.15) | 1.68 (1.23, 2.28) |
| 2.96 (2.23, 3.93)* | 1.70 (1.34, 2.15)* | 1.75 (1.28, 2.39)* |
| DD vs POP | 1.25 (0.93, 1.68) | 1.74 (1.37, 2.21) | 0.72 (0.51, 1.02) |
| 1.18 (0.87, 1.59)* | 1.62 (1.27, 2.06)* | 0.73 (0.51, 1.04)* |

* Odds ratios adjusted by sex, maternal age, and maternal education

Note: ED = expressive dominant, RD = receptive dominant, ND = non-dominant, ASD = autism spectrum disorder, DD = developmental disability, POP = population control

Results of sensitivity analysis to assess the effect of excluding participants with an ELAE or RLAE score at the ceiling

Supplemental Table 7. Adjusted means* of receptive and expressive language raw scores and age equivalents by final classification and language dominance – excluding participants with ELAE or RLAE at the ceiling (N = 1904)

|  | *ASD* | *DD* | *POP* |
| --- | --- | --- | --- |
| Expressive Dominant | N = 158 | N = 99 | N = 61 |
| Receptive raw score | 28.36 (27.46, 29.26) | 35.06 (34.09, 36.03) | 36.43 (35.23, 37.64) |
| Receptive AE | 32.91 (31.46, 34.37) | 41.24 (39.67, 42.81) | 43.63 (41.68, 45.59) |
| Expressive raw score | 32.92 (31.94, 33.89) | 39.27 (38.22, 40.33) | 41.08 (39.76, 42.39) |
| Expressive AE | 38.60 (37.13, 40.08) | 48.75 (47.16, 50.34) | 52.43 (50.45, 54.41) |
| Receptive Dominant | N = 167 | N = 159 | N = 69 |
| Receptive raw score | 33.87 (33.03, 34.72) | 37.33 (36.56, 38.10) | 39.30 (38.14, 40.45) |
| Receptive AE | 40.99 (39.62, 42.36) | 46.18 (44.93, 47.42) | 49.96 (48.09, 51.82) |
| Expressive raw score | 26.88 (25.96, 27.80) | 30.41 (29.57, 31.25) | 33.32 (32.06, 34.57) |
| Expressive AE | 30.34 (28.95, 31.73) | 34.69 (33.43, 35.95) | 38.12 (36.23, 40.01) |
| Non-dominant | N = 324 | N = 502 | N = 365 |
| Receptive raw score | 34.68 (34.02, 35.34) | 37.43 (36.93, 37.92) | 38.57 (38.00, 39.15) |
| Receptive AE | 41.35 (40.28, 42.43) | 46.12 (45.32, 46.92) | 48.98 (48.05, 49.92) |
| Expressive raw score | 33.60 (32.87, 34.32) | 36.64 (36.10, 37.18) | 37.94 (37.31, 38.57) |
| Expressive AE | 39.64 (38.55, 40.73) | 44.36 (43.54, 45.17) | 47.45 (46.50, 48.39) |

Note: AE = age equivalent, ASD = autism spectrum disorder, DD = developmental disability, POP = population control

* Values are adjusted by sex, final case status, child age (mo) at clinic visit, language dominance status, VRAE:CA ratio, final case status by language dominance interaction, sex by final case status interaction, maternal age, and maternal education

Supplemental Table 8: Unadjusted and adjusted odds ratio estimates and 95% confidence intervals for language dominance by case status – excluding participants with an ELAE or RLAE at the ceiling (N = 1905)

|  | *Language dominance comparisons* | | |
| --- | --- | --- | --- |
|  | *ED vs ND* | *RD vs ND* | *ED vs RD* |
| ASD vs POP | 2.94 (2.11, 4.09) | 2.73 (1.98, 3.75) | 1.08 (0.72, 1.62) |
| 3.01 (2.14, 4.23) | 2.69 (1.94, 3.72) | 1.12 (0.74, 1.70) |
| ASD vs DD | 2.49 (1.87, 3.32) | 1.63 (1.26, 2.11) | 1.53 (1.10, 2.13) |
| 2.62 (1.95, 3.51) | 1.67 (1.28, 2.17) | 1.57 (1.12, 2.21) |
| DD vs POP | 1.18 (0.83, 1.67) | 1.68 (1.23, 2.29) | 0.70 (0.46, 1.08) |
| 1.15 (0.81, 1.63) | 1.61 (1.17, 2.21) | 0.71 (0.46, 1.10) |

* Odds ratios adjusted by sex, maternal age, and maternal education

Note: ED = expressive dominant, RD = receptive dominant, ND = non-dominant, ASD = autism spectrum disorder, DD = developmental disability, POP = population control
